# Supplementary material
Source: Springer Nature journal article supplement (https://www.springermedizin.de/resource/supplementary/13550_2012_123_MOESM1_ESM.pdf/9687646)
Supplement: MOESM1 [file 9687646]

Additional file 1. Primers used in the construction of chimeric derivatives of antibody 14C5 expression plasmids

| <b>Name</b>              | <b>Sequence 5' to 3'</b>                            |
|--------------------------|-----------------------------------------------------|
| <b>NM 101 F</b>          | CAACGTGCTGGTTATTGTGCTGTC                            |
| <b>14C5 VH B SOE</b>     | AGACCGATGGACCCCTTGGTGGAGGCTGAGGAGACGGTGACTGAGG      |
| <b>PH1 CH1 F SOE</b>     | AGGAACCTCAGTCACCGTCTCCTCAGCCTCCACCAAGGGTCCATC       |
| <b>NM 263 B</b>          | TATGGATCCTTATCCGGAGGGCCCTGCGGCCGCACAAGATTTGGGCTC    |
| <b>14C5 VL B SOE</b>     | AGACAGATGGTGCAGCCACAGTTCGTTTGATTTCCAGCTTGGTGCCTCCAC |
| <b>PH1 CL F SOE</b>      | TGGAGGCACCAAGCTGGAAATCAAACGAACTGTGGCTGCACCATCTGTC   |
| <b>NM 264 B</b>          | TATGGATCCTTATCCGGAGGGCCCACACTCTCCCCTGTTGAAGCTC      |
| <b>CH1 Hi B</b>          | GCACGGTGGGCATGTGTGAGTTTTGTGACAAGATTTGGGCTCAACTTTC   |
| <b>CH2 F</b>             | CAAACTCACACATGCCACCGTGCCAGCACCTGAACTCCTGGGGGGAC     |
| <b>CH2 B</b>             | TGTGGTTCTCGGGGCTGCCCTTTGGCTTTGGAGATGGTTTTTC         |
| <b>CH3 F</b>             | AAACCATCTCAAAGCCAAAGGGCAGCCCCGAGAACCACAGG           |
| <b>CH3 B</b>             | ATGGATCCTTATTTACCCGGAGACAGGGAGAGGC                  |
| <b>Hum hinge BspEI B</b> | TCCGGATGGGCACGGTGGGCATGTGTGAGTTTTGTC                |
